# Supplementary material for: A three dimensional SiOx/C@RGO nanocomposite as a high energy anode material for lithium-ion batteries
Source: Royal Society of Chemistry journal article supplement (doi:10.1039/c3ta13746e), 2013-12-09
Supplement: c3ta13746e.pdf [file c3ta13746e.pdf]

## Electronic Supplementary Information for A SiO<sub>x</sub>/C@RGO three dimensional nanocomposite as a high energy anode material for lithium-ion batteries †

Chenfeng Guo, Dianlong Wang\*, Tiefeng Liu, Junsheng Zhu and Xiaoshi Lang

5 School of Chemical Engineering and Technology, Harbin Institute of Technology, Harbin, China.

Fax: +86 451 86413721; Tel: +86 451 86413751

\* To whom correspondence should be addressed. E-mail: [wangdianlonghit@163.com](mailto:wangdianlonghit@163.com), [chenfeng1984hit@aliyun.com](mailto:chenfeng1984hit@aliyun.com)

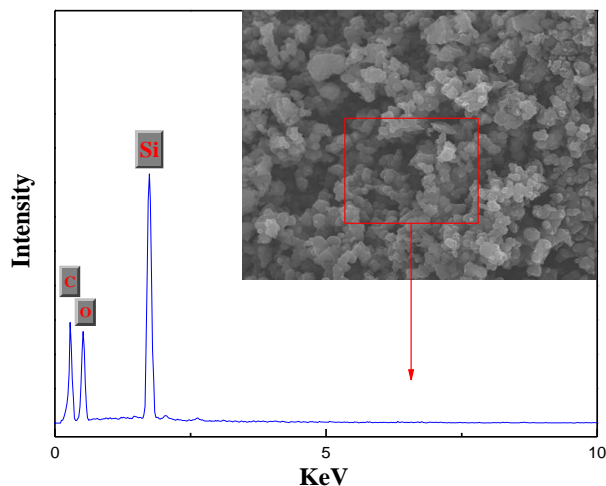

Fig. S1 EDAX spectra from the surface of the SiO<sub>x</sub>/C NPs.

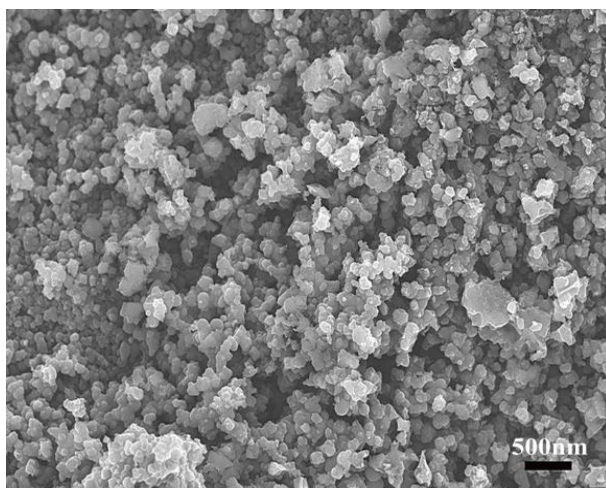

Fig. S2 FESEM of the SiO<sub>x</sub>/C NPs.

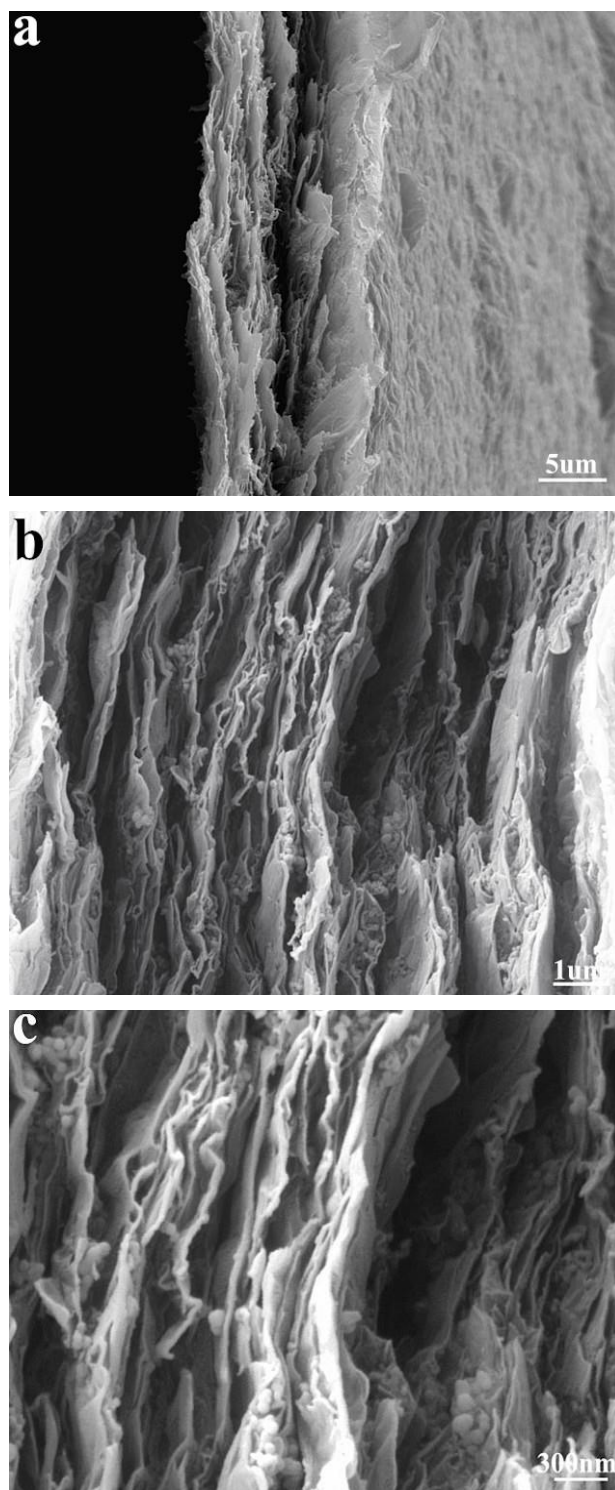

**Fig. S3** Cross-section view FESEM images of SiO<sub>x</sub>/C@RGO at different magnification.

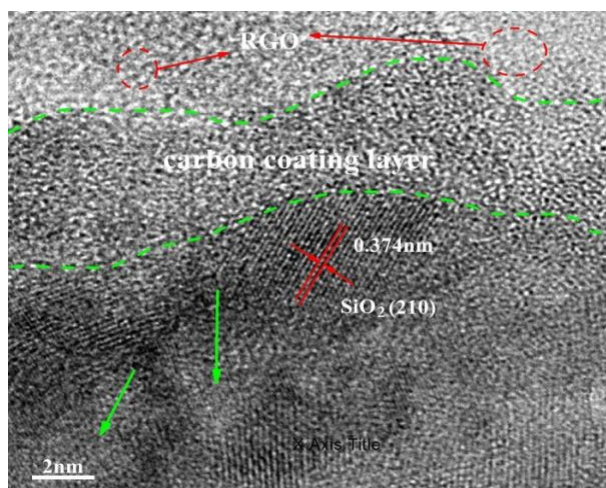

Fig. S4 HRTEM of the SiO<sub>x</sub>/C@RGO NCPs.

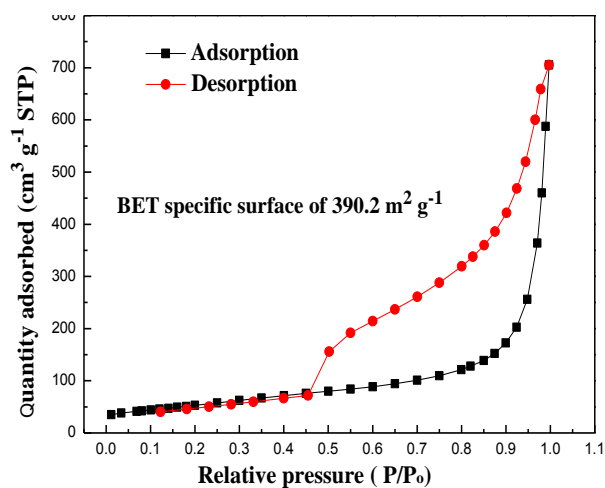

Fig. S5 BET isothermal profile of SiO<sub>x</sub>/C@RGO NCPs.

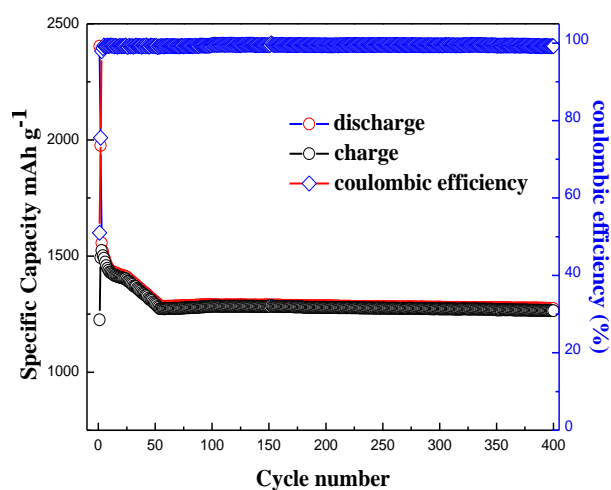

Fig. S6 Superior cycle stability of SiO<sub>x</sub>/C@RGO NCPs in the long-run up to 400 cycles under a current density of 100 mA g<sup>-1</sup>. (Red: discharge capacity; Black: charge capacity; blue: coulombic efficiency)
